# Supplementary material for: Phylogenomics and plastome evolution of Indigofera (Fabaceae)
Source: Front Plant Sci. 2023 Jun 6;14:1186598. doi: 10.3389/fpls.2023.1186598 (PMC10280451; doi:10.3389/fpls.2023.1186598)
Supplement: Supplementary file 1 [file Table_1.xlsx]

## Sheet: Supplementary Table S1
Table S1 List of 17 outgroups used in phylogenomic analyses.
Subfamily	Clade	Species	Accession number	Sequence repository
Papilionoideae	Genistoid clade	Ormosia bahiensis	MW628939	GenBank
Papilionoideae	Genistoid clade	Genista tinctoria	MN709859	GenBank
Papilionoideae	Genistoid clade	Templetonia retusa	NC_047372	GenBank
Papilionoideae	Dalbergioid clade	Amorpha fruticosa	NC_047310	GenBank
Papilionoideae	Dalbergioid clade	Zornia myriadena	MW628944	GenBank
Papilionoideae	Dalbergioid clade	Arachis hypogaea	NC_037358	GenBank
Papilionoideae	Mirbelioid clade	Mirbelia oxylobioides	NC_047371	GenBank
Papilionoideae	Mirbelioid clade	Goodia macrocarpa	NC_047331	GenBank
Papilionoideae	Millettioid clade	Centrosema pubescens	MN936099	GenBank
Papilionoideae	Millettioid clade	Cratylia mollis	OL672874	GenBank
Papilionoideae	Millettioid clade	Millettia dura	MN966639	GenBank
Papilionoideae	Robinioid clade	Sesbania drummondii	MW981640	GenBank
Papilionoideae	Robinioid clade	Lotus japonicus	NC_002694	GenBank
Papilionoideae	Robinioid clade	Robinia pseudoacacia	NC_026684	GenBank
Papilionoideae	IRLC	Medicago radiata	NC_042854	GenBank
Papilionoideae	IRLC	Vicia faba	MT120813	GenBank
Papilionoideae	IRLC	Hedysarum semenovii	NC_047344	GenBank

## Sheet: Supplementary Table S2
Table S2 Raw output information of DnaSP for aligned sequence.
Window	Midpoint	Pi	Theta	S
1-1187	887	0.01454	0.01832	39
788-1387	1087	0.00601	0.00893	19
988-1587	1287	0.00288	0.00423	9
1188-1787	1487	0.00225	0.00329	7
1388-2013	1687	0.00394	0.00564	12
1588-2264	1887	0.01253	0.01597	34
1788-2471	2149	0.01376	0.01785	38
2014-2709	2364	0.01732	0.02114	45
2265-2909	2609	0.00973	0.01268	27
2472-3109	2809	0.01253	0.01832	39
2710-3309	3009	0.01053	0.01785	38
2910-3509	3209	0.01229	0.02114	45
3110-3715	3409	0.01201	0.0202	43
3310-3927	3615	0.01496	0.02161	46
3510-4127	3815	0.01521	0.02161	46
3716-4404	4027	0.01783	0.02349	50
3928-4615	4237	0.01497	0.02161	46
4128-4851	4515	0.01635	0.02161	46
4405-5062	4720	0.01125	0.01409	30
4616-5545	4951	0.01587	0.01973	42
4852-5800	5273	0.02052	0.02819	60
5063-6604	5688	0.03725	0.04933	105
5546-6921	6393	0.03432	0.04839	103
5801-7237	6769	0.03185	0.0451	96
6605-7442	7064	0.01465	0.02443	52
6922-7642	7342	0.01268	0.01738	37
7238-7842	7542	0.00762	0.01034	22
7443-8042	7742	0.01219	0.01456	31
7643-8242	7942	0.01046	0.01409	30
7843-8442	8142	0.01249	0.01691	36
8043-8642	8342	0.00865	0.01315	28
8243-8850	8542	0.00844	0.01268	27
8443-9068	8742	0.00673	0.00987	21
8643-9292	8954	0.00984	0.01456	31
8851-9644	9186	0.01404	0.01926	41
9069-9844	9441	0.01277	0.01785	38
9293-10044	9744	0.01105	0.01503	32
9645-10244	9944	0.00573	0.00893	19
9845-10444	10144	0.00631	0.0094	20
10045-10644	10344	0.00382	0.00564	12
10245-10844	10544	0.00365	0.00517	11
10445-11044	10744	0.0029	0.00423	9
10645-11244	10944	0.00367	0.00564	12
10845-11444	11144	0.00606	0.00799	17
11045-11717	11344	0.01012	0.01362	29
11245-11927	11544	0.0135	0.01738	37
11445-12164	11817	0.01323	0.01832	39
11718-12380	12027	0.00909	0.01221	26
11928-12591	12274	0.00816	0.01221	26
12165-13114	12486	0.01171	0.01691	36
12381-13423	12695	0.01851	0.02631	56
12592-13623	13318	0.01696	0.02302	49
13115-13840	13523	0.01343	0.01785	38
13424-14040	13723	0.00582	0.00752	16
13624-14240	13940	0.00502	0.00705	15
13841-14440	14140	0.00651	0.00846	18
14041-14732	14340	0.00761	0.01081	23
14241-14932	14613	0.00907	0.01221	26
14441-15132	14832	0.00573	0.00846	18
14733-15342	15032	0.01115	0.0155	33
14933-15568	15237	0.01429	0.01973	42
15133-15829	15460	0.03109	0.03852	82
15343-16103	15691	0.03241	0.03758	80
15569-16375	16001	0.0312	0.03711	79
15830-16677	16209	0.01866	0.02631	56
16104-16896	16530	0.01284	0.0202	43
16376-17115	16777	0.0135	0.02067	44
16678-17328	17013	0.01199	0.01644	35
16897-17580	17220	0.01382	0.01926	41
17116-18672	17478	0.02589	0.02866	61
17329-19167	17697	0.02898	0.03101	66
17581-19426	19060	0.03406	0.03664	78
18673-19651	19283	0.01915	0.02302	49
19168-19851	19545	0.01482	0.01879	40
19427-20051	19751	0.00862	0.01268	27
19652-20276	19951	0.00934	0.01503	32
19852-20510	20154	0.01076	0.01785	38
20052-20739	20401	0.01196	0.01926	41
20288-20944	20633	0.00993	0.0155	33
20511-21151	20839	0.01012	0.01456	31
20740-21366	21051	0.00843	0.01174	25
20945-21571	21266	0.0079	0.01221	26
21152-21771	21469	0.00566	0.0094	20
21367-22001	21671	0.00997	0.01081	23
21572-22202	21875	0.01145	0.01174	25
21772-22436	22101	0.01251	0.01362	29
22002-22652	22311	0.01003	0.01221	26
22203-22872	22548	0.00965	0.01315	28
22437-23376	22752	0.02216	0.02866	61
22653-23697	23136	0.02168	0.03335	71
22873-23947	23503	0.02525	0.03711	79
23377-24184	23839	0.01492	0.0249	53
23698-24384	24077	0.01157	0.01691	36
23948-24584	24284	0.00625	0.0094	20
24185-24784	24484	0.00332	0.0047	10
24385-24984	24684	0.00327	0.00564	12
24585-25184	24884	0.00489	0.00658	14
24785-25384	25084	0.0034	0.0047	10
24985-25584	25284	0.00425	0.00517	11
25185-25784	25484	0.00355	0.00517	11
25385-25984	25684	0.00441	0.00611	13
25585-26184	25884	0.00567	0.00705	15
25785-26384	26084	0.00541	0.00611	13
25985-26584	26284	0.00407	0.00423	9
26185-26784	26484	0.00263	0.00329	7
26385-26984	26684	0.00255	0.00376	8
26585-27184	26884	0.00493	0.00705	15
26785-27384	27084	0.00557	0.00846	18
26985-27584	27284	0.0063	0.0094	20
27185-27784	27484	0.00499	0.00752	16
27385-27984	27684	0.00428	0.00564	12
27585-28184	27884	0.00725	0.00846	18
27785-28384	28084	0.00634	0.00752	16
27985-28584	28284	0.00685	0.00752	16
28185-28816	28484	0.00442	0.00658	14
28385-29016	28684	0.00635	0.0094	20
28585-29216	28916	0.00611	0.01034	22
28817-29427	29116	0.00596	0.01034	22
29017-29682	29316	0.00717	0.01221	26
29217-30260	29582	0.01561	0.02349	50
29428-30638	29949	0.02142	0.03195	68
29683-30838	30519	0.02184	0.03242	69
30261-31068	30738	0.01298	0.02067	44
30639-31297	30938	0.00758	0.01362	29
30839-31522	31188	0.00724	0.01221	26
31069-31722	31416	0.00935	0.01503	32
31298-31922	31622	0.00876	0.01268	27
31523-32122	31822	0.0062	0.01034	22
31723-32322	32022	0.00324	0.00564	12
31923-32522	32222	0.00204	0.00423	9
32123-32722	32422	0.00422	0.00752	16
32323-32922	32622	0.006	0.00893	19
32523-33122	32822	0.00565	0.00752	16
32723-33322	33022	0.00329	0.00329	7
32923-33522	33222	0.00349	0.00376	8
33123-33722	33422	0.0053	0.00611	13
33323-33922	33622	0.00757	0.00799	17
33523-34141	33822	0.00568	0.00705	15
33723-34379	34022	0.01324	0.01691	36
33923-34840	34261	0.01547	0.02208	47
34142-35077	34483	0.02208	0.0296	63
34380-35300	34967	0.01887	0.02772	59
34841-35648	35194	0.0214	0.03148	67
35078-35865	35431	0.02068	0.03288	70
35301-36086	35755	0.01748	0.02678	57
35649-36292	35984	0.01444	0.02255	48
35866-36516	36191	0.01176	0.01832	39
36091-36721	36399	0.01068	0.01785	38
36293-36925	36621	0.01192	0.01738	37
36517-37402	36825	0.01884	0.0249	53
36722-37634	37295	0.02058	0.02678	57
36926-37834	37503	0.02134	0.02819	60
37403-38034	37734	0.01155	0.01597	34
37635-38280	37934	0.01326	0.01832	39
37835-38934	38162	0.01446	0.01879	40
38035-39163	38423	0.01851	0.02537	54
38285-39429	39063	0.0201	0.02396	51
38935-39710	39267	0.01796	0.02208	47
39164-39922	39529	0.01624	0.0202	43
39430-40177	39814	0.01256	0.01973	42
39711-40659	40072	0.01732	0.02819	60
39923-40879	40504	0.01777	0.02913	62
40178-41083	40764	0.01907	0.02913	62
40660-41338	40983	0.01647	0.02208	47
40880-41582	41237	0.01922	0.02208	47
41110-41821	41467	0.02024	0.02255	48
41339-42049	41717	0.01936	0.02255	48
41583-42332	41937	0.01847	0.02537	54
41822-42558	42176	0.01647	0.02443	52
42050-42758	42455	0.01166	0.01973	42
42333-42958	42658	0.00651	0.01081	23
42559-43158	42858	0.00385	0.00658	14
42759-43358	43058	0.00251	0.0047	10
42959-43558	43258	0.00448	0.00752	16
43159-43758	43458	0.00589	0.00893	19
43359-43958	43658	0.00729	0.01081	23
43559-44158	43858	0.00689	0.0094	20
43759-44358	44058	0.00868	0.01268	27
43959-44558	44258	0.00818	0.01174	25
44159-44758	44458	0.00799	0.01221	26
44359-44958	44658	0.0049	0.00799	17
44559-45158	44858	0.00576	0.00846	18
44759-45358	45058	0.00423	0.00658	14
44959-45558	45258	0.00441	0.00611	13
45159-45758	45458	0.00327	0.00564	12
45359-45958	45658	0.00511	0.00752	16
45559-46158	45858	0.0053	0.00846	18
45759-46358	46058	0.00563	0.00893	19
45959-46608	46258	0.00634	0.01174	25
46159-46822	46508	0.0079	0.01362	29
46359-47036	46715	0.01154	0.01691	36
46609-47241	46931	0.01098	0.01503	32
46823-47441	47141	0.00846	0.01127	24
47037-47641	47341	0.00432	0.00705	15
47242-47841	47541	0.00327	0.0047	10
47442-48041	47741	0.00546	0.00564	12
47642-48241	47941	0.0068	0.00705	15
47842-48441	48141	0.00932	0.01127	24
48042-48641	48341	0.00898	0.01268	27
48242-48841	48541	0.00818	0.01315	28
48442-49041	48741	0.00583	0.0094	20
48642-49241	48941	0.00413	0.00705	15
48842-49441	49141	0.00417	0.00564	12
49042-49641	49341	0.00398	0.00611	13
49242-49841	49541	0.00564	0.00752	16
49442-50041	49741	0.00686	0.00846	18
49642-50241	49941	0.00736	0.0094	20
49842-50447	50141	0.00817	0.01174	25
50042-50647	50341	0.00846	0.01221	26
50242-50847	50547	0.00832	0.01221	26
50448-51047	50747	0.0075	0.01268	27
50648-51247	50947	0.00615	0.01174	25
50848-51447	51147	0.00602	0.01221	26
51048-51650	51347	0.00602	0.01174	25
51248-51850	51550	0.00738	0.01409	30
51448-52068	51750	0.02122	0.02208	47
51651-52271	51968	0.02329	0.0249	53
51851-52471	52171	0.02048	0.01973	42
52069-52671	52371	0.00661	0.00987	21
52272-52871	52571	0.00432	0.00611	13
52472-53123	52771	0.00913	0.01268	27
52672-53351	52972	0.01638	0.02161	46
52872-53551	53229	0.01505	0.0202	43
53124-53751	53451	0.01125	0.01597	34
53352-53951	53651	0.00389	0.00658	14
53552-54168	53851	0.00605	0.0094	20
53752-54372	54055	0.00535	0.00752	16
53952-54572	54272	0.00419	0.00658	14
54169-54772	54472	0.0032	0.00376	8
54373-54972	54672	0.00327	0.0047	10
54573-55226	54872	0.01062	0.01409	30
54773-55464	55077	0.01477	0.01926	41
54973-56135	55338	0.02416	0.02913	62
55232-56392	56028	0.02067	0.02537	54
55465-56614	56271	0.01835	0.02349	50
56136-56814	56510	0.00995	0.01597	34
56393-57086	56714	0.01559	0.02114	45
56615-57569	56962	0.02062	0.02678	57
56815-57797	57223	0.02416	0.03054	65
57087-58016	57697	0.01972	0.02584	55
57570-58256	57901	0.0135	0.01973	42
57798-58473	58136	0.01251	0.01738	37
58017-58686	58369	0.00897	0.01362	29
58257-58886	58586	0.00958	0.01268	27
58474-59157	58786	0.00825	0.00987	21
58687-59371	58986	0.00841	0.00987	21
58887-59571	59271	0.00868	0.00987	21
59158-59771	59471	0.00678	0.00893	19
59372-59971	59671	0.00782	0.00987	21
59572-60171	59871	0.00554	0.00752	16
59772-60371	60071	0.00732	0.00987	21
59972-60571	60271	0.00473	0.00658	14
60172-60776	60471	0.00518	0.00658	14
60372-61204	60671	0.00841	0.01081	23
60572-61444	61003	0.01381	0.01785	38
60777-61681	61344	0.01432	0.01926	41
61205-61887	61551	0.01101	0.01456	31
61445-62087	61781	0.00889	0.01268	27
61682-62287	61987	0.01043	0.01456	31
61888-62672	62187	0.01346	0.01879	40
62088-62972	62554	0.01872	0.02819	60
62288-63348	62824	0.01866	0.02913	62
62673-63585	63084	0.01521	0.02443	52
62973-63838	63448	0.01362	0.01926	41
63349-64040	63709	0.01275	0.01832	39
63586-64319	63940	0.01323	0.02067	44
63839-65247	64140	0.02013	0.02772	59
64041-65459	65141	0.01968	0.02631	56
64320-65688	65356	0.02876	0.03242	69
65248-65981	65567	0.02859	0.03476	74
65460-66182	65855	0.02785	0.03382	72
65689-66383	66081	0.01911	0.02678	57
65982-66628	66283	0.00757	0.01315	28
66183-66873	66528	0.00879	0.0155	33
66384-67079	66761	0.00754	0.01456	31
66629-67290	66978	0.00718	0.01315	28
66874-67780	67179	0.01632	0.0249	53
67080-68077	67586	0.01842	0.02866	61
67291-68278	67934	0.01977	0.03054	65
67808-68478	68178	0.013	0.01973	42
68078-68678	68378	0.01251	0.01738	37
68279-68884	68578	0.01276	0.01785	38
68479-69084	68784	0.00851	0.01409	30
68679-69284	68984	0.00687	0.01127	24
68885-69484	69184	0.00592	0.0094	20
69085-70257	69384	0.01133	0.01456	31
69285-70660	69584	0.01921	0.02584	55
69485-70868	70493	0.01881	0.0249	53
70258-71099	70768	0.01615	0.02396	51
70661-71299	70983	0.00701	0.01174	25
70869-71499	71199	0.00619	0.01034	22
71100-71706	71399	0.00599	0.0094	20
71300-71938	71599	0.01096	0.01691	36
71500-72177	71821	0.0128	0.02208	47
71707-72377	72077	0.0124	0.02208	47
71939-72577	72277	0.0094	0.01785	38
72178-72777	72477	0.00751	0.01174	25
72378-73016	72677	0.01255	0.01691	36
72578-73216	72909	0.01068	0.01315	28
72778-73416	73116	0.01182	0.0155	33
73017-73616	73316	0.00567	0.00893	19
73217-73816	73516	0.00633	0.01081	23
73417-74016	73716	0.00452	0.00846	18
73617-74270	73916	0.00767	0.01127	24
73817-74504	74142	0.01319	0.01738	37
74017-74745	74396	0.02172	0.02866	61
74271-75018	74627	0.02788	0.03429	73
74505-75325	74853	0.02687	0.03335	71
74746-75525	75137	0.01897	0.02349	50
75019-75761	75425	0.00811	0.01174	25
75326-75961	75631	0.00254	0.00517	11
75526-76161	75861	0.00223	0.00329	7
75762-76371	76061	0.00377	0.00611	13
75962-76612	76261	0.01174	0.01785	38
76162-76959	76507	0.01561	0.02302	49
76372-77219	76714	0.02072	0.0296	63
76613-77573	77101	0.02084	0.02772	59
76960-77782	77344	0.02258	0.03195	68
77220-77982	77673	0.0187	0.02537	54
77574-78184	77882	0.0175	0.02302	49
77783-78404	78082	0.01598	0.0202	43
77983-78632	78292	0.01817	0.02302	49
78185-78852	78509	0.01489	0.0202	43
78405-79815	78732	0.02949	0.03758	80
78633-80081	79193	0.03257	0.04134	88
78853-80312	79966	0.03202	0.03946	84
79816-80556	80194	0.02148	0.02537	54
80082-80842	80436	0.01743	0.02114	45
80313-81046	80668	0.01812	0.02208	47
80557-81283	80946	0.01401	0.01926	41
80847-81512	81146	0.01102	0.01644	35
81047-81715	81412	0.00819	0.01409	30
81284-81924	81612	0.00953	0.01268	27
81513-82124	81815	0.01375	0.01738	37
81716-82333	82024	0.01265	0.0155	33
81925-82555	82233	0.00886	0.01456	31
82125-82762	82434	0.00767	0.01268	27
82334-82963	82661	0.01014	0.01691	36
82556-83217	82863	0.01601	0.02067	44
82763-83433	83112	0.01202	0.01597	34
82964-83645	83317	0.01399	0.01785	38
83218-83862	83545	0.00762	0.01268	27
83434-84066	83745	0.01397	0.01879	40
83646-84325	83966	0.01075	0.01409	30
83863-84527	84217	0.0095	0.01174	25
84067-84727	84427	0.003	0.00564	12
84326-84976	84627	0.00598	0.01034	22
84528-85239	84827	0.00921	0.01362	29
84728-85441	85128	0.01154	0.01738	37
84977-85648	85341	0.01104	0.01644	35
85240-85854	85548	0.0107	0.01644	35
85442-86055	85749	0.0114	0.01832	39
85649-86255	85955	0.00857	0.01409	30
85855-86455	86155	0.00604	0.01174	25
86056-86655	86355	0.00546	0.00799	17
86256-86855	86555	0.00727	0.01034	22
86456-87055	86755	0.00802	0.01127	24
86656-87255	86955	0.00811	0.01174	25
86856-87455	87155	0.00671	0.00987	21
87056-87655	87355	0.00563	0.00705	15
87256-87860	87555	0.00675	0.00893	19
87456-88060	87760	0.01092	0.01127	24
87656-88260	87960	0.01029	0.01127	24
87861-88460	88160	0.00933	0.00987	21
88061-88661	88360	0.00679	0.00987	21
88261-88867	88560	0.0105	0.01362	29
88461-89084	88767	0.01255	0.01785	38
88662-89314	88975	0.01275	0.01832	39
88868-89530	89209	0.0114	0.01738	37
89085-89730	89427	0.0071	0.01034	22
89315-89930	89630	0.00489	0.00705	15
89531-90130	89830	0.00458	0.00658	14
89731-90350	90030	0.00545	0.00846	18
89931-90554	90242	0.00674	0.01127	24
90131-90755	90450	0.00789	0.01362	29
90351-91023	90654	0.01232	0.02114	45
90555-91223	90902	0.01062	0.01879	40
90756-91423	91123	0.00891	0.01597	34
91024-91623	91323	0.00404	0.00752	16
91224-91847	91523	0.01175	0.01362	29
91424-92047	91728	0.01434	0.01597	34
91624-92247	91947	0.01575	0.01691	36
91848-92447	92147	0.00818	0.01081	23
92048-92647	92347	0.00456	0.00705	15
92248-92857	92547	0.00384	0.00752	16
92448-93062	92747	0.00583	0.00846	18
92648-93262	92962	0.00785	0.01081	23
92858-93699	93162	0.01532	0.01691	36
93063-93961	93362	0.01754	0.0202	43
93263-94230	93861	0.02139	0.02584	55
93700-94454	94070	0.02195	0.02772	59
93962-94654	94344	0.01947	0.0249	53
94231-94854	94554	0.01596	0.01973	42
94455-95137	94754	0.00833	0.01081	23
94655-95350	94970	0.00729	0.0094	20
94855-95555	95250	0.00555	0.00752	16
95138-95784	95450	0.00575	0.0094	20
95351-95984	95679	0.0061	0.00987	21
95556-96184	95884	0.00565	0.0094	20
95785-96508	96084	0.01168	0.01926	41
95985-96734	96334	0.01914	0.02913	62
96185-96974	96626	0.02191	0.03195	68
96509-97174	96845	0.01939	0.0249	53
96735-97441	97074	0.01711	0.02349	50
96975-97746	97328	0.01897	0.0249	53
97175-97946	97608	0.01482	0.01926	41
97442-98146	97846	0.0096	0.01127	24
97747-98346	98046	0.00638	0.00987	21
97947-99116	98246	0.01172	0.01785	38
98147-99366	99016	0.01355	0.01926	41
98347-99592	99216	0.01166	0.0155	33
99117-99792	99492	0.00567	0.00752	16
99367-99992	99692	0.00363	0.0047	10
99593-100204	99892	0.00365	0.00517	11
99793-100404	100098	0.00351	0.0047	10
99993-100604	100304	0.00189	0.00329	7
100205-100804	100504	0.00172	0.00282	6
100405-101004	100704	0.00067	0.00188	4
100605-101204	100904	0.00067	0.00188	4
100805-101404	101104	0.00082	0.00188	4
101005-101604	101304	0.00178	0.00376	8
101205-101804	101504	0.00161	0.00329	7
101405-102004	101704	0.00226	0.0047	10
101605-102204	101904	0.00145	0.00282	6
101805-102404	102104	0.00218	0.00376	8
102005-102604	102304	0.00192	0.00235	5
102205-102804	102504	0.00192	0.00235	5
102405-103004	102704	0.00119	0.00141	3
102605-103204	102904	0.00114	0.00141	3
102805-103404	103104	0.00161	0.00235	5
103005-103604	103304	0.00305	0.00517	11
103205-103804	103504	0.00279	0.0047	10
103405-104004	103704	0.00277	0.00423	9
103605-104225	103904	0.00149	0.00188	4
103805-104425	104125	0.00093	0.00141	3
104005-104625	104325	0.0005	0.00141	3
104226-104825	104525	0.00138	0.00235	5
104426-105025	104725	0.00199	0.00329	7
104626-105225	104925	0.00247	0.00423	9
104826-105425	105125	0.00191	0.00376	8
105026-105625	105325	0.00226	0.00376	8
105226-105825	105525	0.00211	0.00235	5
105426-106025	105725	0.00179	0.00188	4
105626-106225	105925	0.00114	0.00141	3
105826-106425	106125	0.00082	0.00188	4
106026-106706	106325	0.00098	0.00235	5
106226-106906	106606	0.00083	0.00235	5
106426-107106	106806	0.001	0.00282	6
106707-107306	107006	0.00083	0.00235	5
106907-107506	107206	0.00083	0.00235	5
107107-107706	107406	0.00067	0.00188	4
107307-107906	107606	0.00123	0.00235	5
107507-108106	107806	0.00139	0.00282	6
107707-108306	108006	0.00154	0.00282	6
107907-108506	108206	0.00082	0.00188	4
108107-108706	108406	0.00048	0.00094	2
108307-108912	108606	0.00138	0.00188	4
108507-109112	108811	0.00239	0.00282	6
108707-109312	109012	0.00358	0.00423	9
108913-109512	109212	0.00254	0.00329	7
109113-109717	109412	0.00169	0.00282	6
109313-109917	109617	0.00111	0.00235	5
109513-110117	109817	0.00078	0.00141	3
109718-110317	110017	0.00078	0.00141	3
109918-110517	110217	0.00101	0.00094	2
110118-110717	110417	0.00118	0.00141	3
110318-110917	110617	0.00157	0.00141	3
110518-111117	110817	0.00073	0.00094	2
110718-111317	111017	0.00056	0.00047	1
110918-111517	111217	0.00017	0.00047	1
111118-111717	111417	0.00111	0.00188	4
111318-111917	111617	0.00188	0.00282	6
111518-112138	111817	0.00251	0.00376	8
111718-112338	112038	0.00156	0.00235	5
111918-112538	112238	0.0008	0.00141	3
112139-112738	112438	0	0	0
112339-112939	112638	0	0	0
112539-113196	112838	0.00017	0.00047	1
112739-113396	113039	0.00048	0.00094	2
112940-113596	113296	0.00048	0.00094	2
113197-113799	113496	0.00082	0.00188	4
113397-114035	113696	0.00261	0.00423	9
113597-114235	113899	0.00375	0.00564	12
113800-114435	114135	0.0042	0.00564	12
114036-114635	114335	0.00382	0.00564	12
114236-114835	114535	0.00316	0.00517	11
114436-115057	114735	0.00298	0.00517	11
114636-115257	114955	0.00216	0.00376	8
114836-115457	115157	0.00184	0.00329	7
115058-115657	115357	0.00138	0.00235	5
115258-115857	115557	0.00048	0.00094	2
115458-116057	115757	0.00032	0.00047	1
115658-116257	115957	0.00129	0.00141	3
115858-116457	116157	0.00129	0.00141	3
116058-116657	116357	0.00129	0.00141	3
116258-116857	116557	0	0	0
116458-117059	116757	0.00168	0.00141	3
116658-117259	116959	0.00185	0.00188	4
116858-117459	117159	0.00723	0.00658	14
117060-117659	117359	0.00554	0.00517	11
117260-117859	117559	0.00569	0.00517	11
117460-118059	117759	0.00032	0.00047	1
117660-118259	117959	0.00182	0.00188	4
117860-118464	118159	0.00182	0.00188	4
118060-118664	118364	0.00226	0.00235	5
118260-118864	118564	0.00138	0.00188	4
118465-119064	118764	0.00179	0.00235	5
118665-119264	118964	0.00166	0.00235	5
118865-119464	119164	0.00104	0.00141	3
119065-119664	119364	0.00065	0.00141	3
119265-119864	119564	0.0005	0.00141	3
119465-120064	119764	0.00095	0.00188	4
119665-120264	119964	0.00118	0.00141	3
119865-120464	120164	0.00101	0.00094	2
120065-120664	120364	0.00056	0.00047	1
120265-120864	120564	0	0	0
120465-121064	120764	0.00033	0.00094	2
120665-121264	120964	0.00162	0.00235	5
120865-121464	121164	0.00162	0.00235	5
121065-121664	121364	0.00129	0.00141	3
121265-121864	121564	0.00076	0.00094	2
121465-122064	121764	0.00076	0.00094	2
121665-122264	121964	0.00076	0.00094	2
121865-122464	122164	0	0	0
122065-122664	122364	0.00088	0.00094	2
122265-122864	122564	0.00104	0.00141	3
122465-123064	122764	0.00273	0.00282	6
122665-123290	122964	0.00218	0.00282	6
122865-123518	123185	0.00351	0.00423	9
123065-123725	123390	0.00861	0.00987	21
123291-123938	123625	0.00954	0.01127	24
123519-124138	123838	0.01142	0.01221	26
123726-124338	124038	0.00511	0.00611	13
123939-124578	124238	0.00571	0.00705	15
124139-124778	124478	0.00268	0.00517	11
124339-125105	124678	0.00825	0.01268	27
124579-125305	124878	0.01407	0.01879	40
124779-125505	125205	0.01851	0.0249	53
125106-125705	125405	0.0219	0.02772	59
125306-125917	125605	0.01913	0.02772	59
125506-126117	125811	0.01591	0.02302	49
125706-126317	126017	0.00817	0.01503	32
125918-126517	126217	0.00775	0.01081	23
126118-126717	126417	0.01161	0.01503	32
126318-126917	126617	0.01437	0.01644	35
126518-127117	126817	0.01181	0.01362	29
126718-127317	127017	0.01323	0.01597	34
126918-127562	127217	0.02177	0.02772	59
127118-127975	127420	0.03544	0.04416	94
127318-128214	127871	0.0361	0.04416	94
127563-128419	128096	0.02763	0.03382	72
127976-129674	128314	0.03673	0.04228	90
128215-129903	129392	0.03281	0.03852	82
128420-130118	129802	0.03211	0.03805	81
129675-130318	130018	0.00989	0.01362	29
129904-130518	130218	0.01121	0.01456	31
130119-130724	130418	0.01144	0.01644	35
130319-130924	130624	0.01127	0.01738	37
130519-131135	130824	0.00963	0.01644	35
130725-131362	131024	0.01147	0.01597	34
130925-131562	131262	0.01259	0.01644	35
131136-131762	131462	0.01255	0.01691	36
131363-131962	131662	0.00811	0.01221	26
131563-132162	131862	0.00892	0.01362	29
131763-132362	132062	0.00728	0.01081	23
131963-132562	132262	0.00903	0.01221	26
132163-132762	132462	0.01402	0.01503	32
132363-132962	132662	0.01621	0.01738	37
132563-133162	132862	0.01561	0.01879	40
132763-133383	133062	0.00935	0.0155	33
132963-133583	133274	0.00762	0.01362	29
133163-133797	133483	0.0085	0.01503	32
133384-134026	133683	0.01166	0.01832	39
133584-134226	133922	0.01043	0.01691	36
133798-134426	134126	0.00875	0.01362	29
134027-134655	134326	0.00989	0.01409	30
134227-135352	134532	0.02389	0.03195	68
134427-135579	134848	0.02647	0.03476	74
134656-135779	135479	0.02142	0.02866	61
135353-135985	135679	0.0091	0.01221	26
135580-136185	135879	0.00811	0.01081	23
135780-136385	136085	0.00917	0.01362	29
135986-136586	136285	0.00982	0.0155	33
136186-136809	136485	0.00976	0.01597	34
136386-137191	136693	0.0136	0.02114	45
136587-137412	136916	0.01632	0.02349	50
136810-137630	137312	0.01602	0.02443	52
137192-137906	137525	0.01184	0.01785	38
137413-138138	137748	0.01054	0.01691	36
137631-138338	138038	0.00922	0.01362	29
137907-138538	138238	0.0096	0.01503	32
138139-138738	138438	0.00602	0.01081	23
138339-138938	138638	0.00668	0.01268	27
138539-139138	138838	0.00388	0.00846	18
138739-139338	139038	0.00482	0.00987	21
138939-139538	139238	0.00373	0.00799	17
139139-139738	139438	0.0063	0.01174	25
139339-139946	139638	0.00763	0.01362	29
139539-140146	139846	0.00832	0.01409	30
139739-140402	140046	0.01673	0.0249	53
139947-140622	140253	0.02	0.02866	61
140147-140849	140517	0.02467	0.03382	72
140403-141064	140722	0.0219	0.0296	63
140623-141282	140949	0.01962	0.02772	59
140850-141482	141164	0.02109	0.03007	64
141065-141688	141382	0.02118	0.03007	64
141283-141888	141588	0.02546	0.03382	72
141483-142136	141788	0.02575	0.03711	79
141689-142342	142000	0.02607	0.03758	80
141889-142542	142242	0.02142	0.03288	70
142137-142742	142442	0.02144	0.03148	67
142343-142942	142642	0.02103	0.03148	67
142543-143142	142842	0.02555	0.03617	77
142743-143369	143042	0.02489	0.03523	75
142943-143572	143263	0.02132	0.03195	68
143143-143772	143472	0.01963	0.03148	67
143370-143990	143672	0.02253	0.03288	70
143573-144205	143872	0.02612	0.03664	78
143773-144405	144090	0.0306	0.04181	89
143991-144617	144305	0.02825	0.04228	90
144206-144817	144505	0.03196	0.04416	94
144406-145017	144717	0.03146	0.0404	86
144618-145232	144917	0.03414	0.04181	89
144818-145444	145117	0.03479	0.04604	98
145018-145644	145344	0.03164	0.04557	97
145233-145844	145544	0.024	0.0357	76
145445-146044	145744	0.01225	0.01879	40
145645-146286	145944	0.00538	0.00893	19
145845-146486	146146	0.00363	0.00564	12
146045-146686	146386	0.00517	0.00705	15
146287-146899	146586	0.00511	0.00611	13
146487-147111	146799	0.01046	0.01174	25
146687-147339	147001	0.00906	0.01034	22
146900-147567	147234	0.01013	0.01081	23
147112-147767	147439	0.00334	0.00376	8
147340-147967	147667	0.00185	0.00188	4
147568-148167	147867	0.00104	0.00141	3
147768-148367	148067	0.00088	0.00094	2
147968-148567	148267	0.00088	0.00094	2
148168-148767	148467	0.00076	0.00094	2
148368-148967	148667	0.00076	0.00094	2
148568-149167	148867	0.00076	0.00094	2
148768-149367	149067	0.00073	0.00094	2
148968-149567	149267	0.00129	0.00141	3
149168-149767	149467	0.00162	0.00235	5
149368-149967	149667	0.00089	0.00141	3
149568-150167	149867	0.00033	0.00094	2
149768-150367	150067	0.00056	0.00047	1
149968-150567	150267	0.00101	0.00094	2
150168-150767	150467	0.00101	0.00094	2
150368-150967	150667	0.00061	0.00094	2
150568-151167	150867	0.0005	0.00141	3
150768-151367	151067	0.0005	0.00141	3
150968-151567	151267	0.00065	0.00141	3
151168-151767	151467	0.00149	0.00188	4
151368-151967	151667	0.00166	0.00235	5
151568-152167	151867	0.00179	0.00235	5
151768-152372	152067	0.00093	0.00141	3
151968-152572	152272	0.00226	0.00235	5
152168-152772	152472	0.00213	0.00235	5
152373-152972	152672	0.00182	0.00188	4
152573-153172	152872	0.00489	0.0047	10
152773-153372	153072	0.00538	0.0047	10
152973-153572	153272	0.00554	0.00517	11
153173-153774	153472	0.00265	0.00235	5
153373-153974	153674	0.00185	0.00188	4
153573-154174	153874	0.00168	0.00141	3
153775-154374	154074	0.00056	0.00047	1
153975-154574	154274	0.00129	0.00141	3
154175-154774	154474	0.00129	0.00141	3
154375-154974	154674	0.00073	0.00094	2
154575-155174	154874	0.00032	0.00047	1
154775-155374	155074	0.00048	0.00094	2
154975-155574	155274	0.00138	0.00235	5
155175-155796	155474	0.00184	0.00329	7
155375-155996	155676	0.00216	0.00376	8
155575-156196	155896	0.00331	0.00564	12
155797-156396	156096	0.00332	0.00564	12
155997-156620	156296	0.00583	0.00752	16
156197-156827	156496	0.00502	0.00658	14
156397-157027	156724	0.00422	0.00517	11
156621-157227	156927	0.00123	0.00235	5
156828-157485	157127	0.00048	0.00094	2
157028-157685	157327	0.00048	0.00094	2
157228-157886	157585	0.00048	0.00094	2
157486-158086	157786	0	0	0
157686-158286	157986	0	0	0
157887-158486	158186	0	0	0
158087-158707	158386	0.0008	0.00141	3
158287-158907	158586	0.00219	0.00329	7
158487-159107	158807	0.00251	0.00376	8
158708-159307	159007	0.00188	0.00282	6
158908-159507	159207	0.00048	0.00094	2
159108-159707	159407	0.00017	0.00047	1
159308-159907	159607	0.00056	0.00047	1
159508-160107	159807	0.00073	0.00094	2
159708-160307	160007	0.00174	0.00188	4
159908-160507	160207	0.00118	0.00141	3
160108-160707	160407	0.00118	0.00141	3
160308-160907	160607	0.00061	0.00094	2
160508-161112	160807	0.00078	0.00141	3
160708-161312	161012	0.00126	0.00235	5
160908-161512	161212	0.0027	0.00376	8
161113-161712	161412	0.00254	0.00329	7
161313-161918	161612	0.00326	0.00376	8
161513-162118	161818	0.00138	0.00188	4
161713-162318	162018	0.00138	0.00188	4
161919-162518	162218	0.00065	0.00141	3
162119-162718	162418	0.00154	0.00282	6
162319-162918	162618	0.00171	0.00329	7
162519-163118	162818	0.00139	0.00282	6
162719-163318	163018	0.0005	0.00141	3
162919-163518	163218	0.0005	0.00141	3
163119-163718	163418	0.00067	0.00188	4
163319-163918	163618	0.00083	0.00235	5
163519-164199	163818	0.001	0.00282	6
163719-164399	164099	0.00115	0.00282	6
163919-164599	164299	0.00098	0.00235	5
164200-164799	164499	0.00147	0.00235	5
164400-164999	164699	0.00099	0.00141	3
164600-165199	164899	0.00196	0.00235	5
164800-165399	165099	0.00193	0.00282	6
165000-165599	165299	0.0021	0.00329	7
165200-165799	165499	0.00175	0.00329	7
165400-165999	165699	0.00199	0.00329	7
165600-166199	165899	0.00199	0.00329	7
165800-166399	166099	0.00138	0.00235	5
166000-166620	166299	0.00126	0.00235	5
166200-166820	166520	0.00093	0.00141	3
166400-167020	166720	0.00181	0.00235	5
166621-167220	166920	0.00201	0.00329	7
166821-167420	167120	0.00279	0.0047	10
167021-167620	167320	0.00274	0.0047	10
167221-167820	167520	0.00161	0.00235	5
167421-168020	167720	0.00114	0.00141	3
167621-168220	167920	0.00119	0.00141	3
167821-168420	168120	0.00192	0.00235	5
168021-168620	168320	0.00209	0.00282	6
168221-168820	168520	0.00218	0.00376	8
168421-169020	168720	0.00145	0.00282	6
168621-169220	168920	0.00258	0.00517	11
168821-169420	169120	0.00161	0.00329	7
169021-169620	169320	0.00178	0.00376	8
169221-169820	169520	0.00033	0.00094	2
169421-170020	169720	0.00067	0.00188	4
169621-170220	169920	0.00067	0.00188	4
169821-170426	170120	0.00189	0.00329	7
170021-170632	170320	0.00336	0.0047	10
170221-170832	170526	0.00351	0.0047	10
170427-171032	170732	0.00348	0.0047	10
170633-171250	170896	0.00227	0.00321	6

## Sheet: Supplementary Table S3
Table S3 Summary statistics of types of SSRs identified in each species.
Species	mono-	di-	tri-	tetra-	penta-	hexa-	complex-	Total
I. amblyantha	51	7	1	1	2	0	0	62
I. atropurpurea	58	12	1	0	2	0	1	74
I. bungeana	55	6	1	0	2	0	0	64
I. carlesii	62	11	1	0	1	0	0	75
I. cassioides	52	12	1	0	1	1	1	68
I. caudata	51	10	1	0	0	0	0	62
I. decora	68	11	1	0	1	0	0	81
I. franchetii	59	13	4	0	1	0	0	77
I. hebepetala var. glabra	61	9	3	0	1	0	1	75
I. hirsuta	65	24	3	0	3	2	0	97
I. kirilowii	64	10	1	0	2	1	0	78
I. linifolia	43	8	2	1	1	0	0	55
I. linnaei 1	51	11	2	0	2	1	0	67
I. linnaei 2	56	11	2	0	2	1	0	72
I. miniata	63	15	2	1	1	0	0	82
I. pendula	57	14	4	0	1	0	0	76
I. scabrida	57	10	2	0	1	0	1	71
I. stachyodes	60	11	2	0	1	0	1	75
I. suffruticosa	57	14	1	0	1	0	0	73
I. wightii	73	14	0	1	1	0	0	89

## Sheet: Supplementary Table S4
Table S4 Summary statistics of the distribution of SSRs identified in each species.
Species	LSC	SSC	IRa	IRb
I. amblyantha	46	14	1	1
I. atropurpurea	58	16	0	0
I. bungeana	48	14	1	1
I. carlesii	61	12	1	1
I. cassioides	50	18	0	0
I. caudata	45	15	1	1
I. decora	65	14	1	1
I. franchetii	57	18	1	1
I. hebepetala var. glabra	59	16	0	0
I. hirsuta	73	20	2	2
I. kirilowii	62	14	1	1
I. linifolia	41	12	1	1
I. linnaei 1	51	12	2	2
I. linnaei 2	56	12	2	2
I. miniata	62	16	2	2
I. pendula	57	17	1	1
I. scabrida	51	18	1	1
I. stachyodes	56	17	1	1
I. suffruticosa	53	18	1	1
I. wightii	70	17	1	1

## Sheet: Supplementary Table S5
Table S5 SSR comparison of 20 plastome genomes in Indigofera.
Species	A/T	C/G	AT/AT	AAT/ATT	AATT/AATT	AGAT/ATCT	AATC/ATTG	AAAT/ATTT	AAAAG/CTTTT	AAATT/AATTT	AAAAG/CTTTT	AATAT/ATATT	AAATT/AATTT	AAATAT/ATATTT	AAATAG/ATTTCT	AAATTG/AATTTC	AATATT/AATATT	AATAGT/ACTATT
I. amblyantha	51	0	7	1	0	0	1	0	0	1	1	0	0	0	0	0	0	0
I. atropurpurea	58	2	12	1	0	0	0	0	1	0	0	0	1	0	0	0	0	0
I. bungeana	55	0	6	1	0	0	0	0	1	1	0	0	0	0	0	0	0	0
I. carlesii	58	4	11	1	0	0	0	0	1	0	0	0	0	0	0	0	0	0
I. cassioides	53	1	12	1	0	0	0	0	1	0	0	0	0	1	0	0	0	0
I. caudata	51	0	10	1	0	0	0	0	0	0	0	0	0	0	0	0	0	0
I. decora	64	4	11	1	0	0	0	0	1	0	0	0	0	0	0	0	0	0
I. franchetii	58	1	13	4	0	0	0	0	1	0	0	0	0	0	0	0	0	0
I. hebepetala var. glabra	62	1	9	3	0	0	0	0	1	0	0	0	0	0	0	0	0	0
I. hirsuta	65	0	24	3	0	0	0	0	1	0	0	2	0	0	1	1	0	0
I. kirilowii	61	3	10	1	0	0	0	0	1	0	0	1	0	0	0	0	1	0
I. linifolia	42	1	8	2	1	0	0	0	1	0	0	0	0	0	0	0	0	0
I. linnaei 1	51	0	11	2	0	0	0	0	2	0	0	0	0	0	0	0	0	1
I. linnaei 2	56	0	11	2	0	0	0	0	2	0	0	0	0	0	0	0	0	1
I. miniata	63	0	15	2	0	0	0	1	1	0	0	0	0	0	0	0	0	0
I. pendula	55	2	14	4	0	0	0	0	1	0	0	0	0	0	0	0	0	0
I. scabrida	58	1	10	2	0	0	0	0	1	0	0	0	0	0	0	0	0	0
I. stachyodes	61	1	11	2	0	0	0	0	1	0	0	0	0	0	0	0	0	0
I. suffruticosa	56	1	14	1	0	0	0	0	1	0	0	0	0	0	0	0	0	0
I. wightii	71	2	14	0	0	1	0	0	1	0	0	0	0	0	0	0	0	0

## Sheet: Supplementary Table S6
Table S6 Summary statistics of long repeat sequences in each species.
Species	Forward	Reverse	Palindromic	Complementary	Total
I. amblyantha	27	9	39	1	76
I. atropurpurea	23	4	31	3	61
I. bungeana	30	7	33	1	71
I. carlesii	43	14	35	4	96
I. cassioides	23	6	30	4	63
I. caudata	37	35	27	0	99
I. decora	43	14	35	5	97
I. franchetii	24	7	30	6	67
I. hebepetala var. glabra	21	11	28	2	62
I. hirsuta	28	11	39	7	85
I. kirilowii	53	21	29	8	111
I. linifolia	20	9	24	5	58
I. linnaei 1	31	10	31	9	81
I. linnaei 2	30	7	30	10	77
I. miniata	40	4	26	10	80
I. pendula	29	9	32	4	74
I. scabrida	22	5	24	6	57
I. stachyodes	17	5	30	2	54
I. suffruticosa	31	11	36	7	85
I. wightii	25	3	31	1	60

## Sheet: Supplementary Table S7
Table S7 Distribution of long repeat sequences of each species.
Species	LSC forward	LSC reverse	LSC palindromic	LSC complementary	SSC forward	SSC reverse	SSC palindromic	SSC complementary	IRa forward	IRa reverse	IRa palindromic	IRa complementary	IRb forward	IRb reverse	IRb palindromic	IRb complementary
I. amblyantha	13	6	24	1	2	3	3	0	5	0	0	0	7	0	12	0
I. atropurpurea	14	2	23	3	4	2	2	0	2	0	1	0	3	0	5	0
I. bungeana	21	4	22	1	1	3	3	0	3	0	1	0	5	0	7	0
I. carlesii	25	11	21	3	8	1	4	0	4	1	1	0	6	1	9	1
I. cassioides	14	4	22	4	4	2	2	0	2	0	1	0	3	0	5	0
I. caudata	9	1	15	0	17	34	1	0	4	0	1	0	7	0	10	0
I. decora	25	11	21	4	8	1	4	0	4	1	1	0	6	1	9	1
I. franchetii	12	5	22	5	5	2	0	1	3	0	1	0	4	0	7	0
I. hebepetala var. glabra	13	10	20	2	3	1	2	0	2	0	1	0	3	0	5	0
I. hirsuta	21	8	28	6	0	3	3	0	3	0	1	0	4	0	7	1
I. kirilowii	34	16	17	7	9	3	2	0	4	1	1	0	6	1	9	1
I. linifolia	16	7	18	4	0	2	2	1	1	0	0	0	3	0	4	0
I. linnaei 1	22	10	20	8	2	0	3	1	2	0	2	0	5	0	6	0
I. linnaei 2	21	7	19	9	2	0	2	1	2	0	3	0	5	0	6	0
I. miniata	32	3	16	6	2	1	4	2	2	0	1	0	4	0	5	2
I. pendula	19	7	21	3	3	2	3	1	3	0	1	0	4	0	7	0
I. scabrida	17	2	18	5	0	3	0	0	2	0	1	0	3	0	5	1
I. stachyodes	11	4	22	2	1	1	2	0	2	0	1	0	3	0	5	0
I. suffruticosa	17	8	19	4	2	2	5	2	5	0	1	0	7	1	11	1
I. wightii	17	3	21	1	0	0	2	0	3	0	1	0	5	0	7	0

## Sheet: Supplementary Table S8
Table S8 Number of long repeat sequence of different lengths in each species.
Species	30-50	51-70	71-100	101-200	201-300	>300	total
I. amblyantha	61	7	0	0	3	5	76
I. atropurpurea	54	3	0	0	0	4	61
I. bungeana	59	4	0	0	3	5	71
I. carlesii	90	2	0	0	0	4	96
I. cassioides	55	4	0	0	0	4	63
I. caudata	86	1	4	4	0	4	99
I. decora	91	2	0	0	0	4	97
I. franchetii	61	2	0	0	0	4	67
I. hebepetala var. glabra	57	1	0	0	0	4	62
I. hirsuta	79	2	0	0	0	4	85
I. kirilowii	101	6	0	0	0	4	111
I. linifolia	50	4	0	0	0	4	58
I. linnaei 1	74	3	0	0	0	4	81
I. linnaei 2	70	3	0	0	0	4	77
I. miniata	72	4	0	0	0	4	80
I. pendula	67	2	0	0	0	5	74
I. scabrida	52	1	0	0	0	4	57
I. stachyodes	48	2	0	0	0	4	54
I. suffruticosa	76	1	4	0	0	4	85
I. wightii	54	2	0	0	0	4	60

## Sheet: Supplementary Table S9
Table S9 Summary of Pairwise Ka/Ks ratios in Indigofera and allied species.
	I. carlesii	I. decora	I. kirilowii	I. pendula	I. scabrida	I. franchetii	I. atropurpurea	I. cassioides	I. stachyodes	I. hebepetala var. glabra	I. caudata	I. suffruticosa	I. hirsuta	I. amblyantha	I. bungeana	I. linnaei 1	I. linnaei 2	I. miniata	I. linifolia	I. wightii	Cratylia mollis	Millettia dura	Centrosema pubescens	Medicago radiata	Vicia faba	Hedysarum semenovii	Lotus japonicus	Robinia pseudoacacia	Sesbania drummondii	Goodia macrocarpa	Mirbelia oxylobioides	Genista tinctoria	Templetonia retusa	Ormosia bahiensis	Arachis hypogaea	Zornia myriadena	Amorpha fruticosa
I. carlesii
I. decora	0.5
I. kirilowii	0.428571	0.5
I. pendula	0.355932	0.372881	0.265625
I. scabrida	0.338983	0.355932	0.265625	0.24
I. franchetii	0.333333	0.350877	0.333333	0.6	0.37037
I. atropurpurea	0.28	0.293333	0.225	0.216667	0.186441	0.278689
I. cassioides	0.302632	0.315789	0.231707	0.225806	0.216667	0.301587	0.2
I. stachyodes	0.304348	0.318841	0.226667	0.245283	0.215686	0.314815	0.16129	0.181818
I. hebepetala var. glabra	0.26087	0.275362	0.269231	0.275862	0.25	0.236364	0.235294	0.277778	0.266667
I. caudata	0.25974	0.285714	0.267442	0.279412	0.253731	0.261538	0.226667	0.246753	0.231884	0.202899
I. suffruticosa	0.254386	0.263158	0.252033	0.252427	0.25	0.235294	0.212389	0.22807	0.214953	0.196262	0.235294
I. hirsuta	0.23	0.24	0.227273	0.211111	0.215909	0.206897	0.175258	0.191919	0.188889	0.166667	0.177083	0.180451
I. amblyantha	0.192488	0.201878	0.178082	0.170854	0.161616	0.189055	0.153846	0.157895	0.160804	0.170732	0.174528	0.176	0.170854
I. bungeana	0.179104	0.18408	0.189573	0.183246	0.173684	0.174603	0.16	0.169154	0.167539	0.154639	0.159204	0.16318	0.154255	0.357143
I. linnaei 1	0.143382	0.150735	0.153571	0.148855	0.145594	0.146154	0.141264	0.147601	0.141221	0.132075	0.138577	0.149502	0.129412	0.142415	0.131833
I. linnaei 2	0.143911	0.147601	0.150538	0.149425	0.146154	0.142857	0.141791	0.144444	0.141762	0.128788	0.138577	0.146667	0.129921	0.139752	0.129032	0
I. miniata	0.172249	0.181818	0.179724	0.176768	0.173469	0.169231	0.163366	0.171569	0.164103	0.15	0.156098	0.159184	0.14433	0.16996	0.157676	0.147541	0.14876
I. linifolia	0.189189	0.19305	0.198502	0.198381	0.192771	0.186992	0.179688	0.18677	0.18	0.167331	0.179688	0.182131	0.176955	0.181818	0.176871	0.175676	0.175676	0.223684
I. wightii	0.180617	0.185022	0.186441	0.186047	0.183962	0.173709	0.175676	0.183036	0.178404	0.166667	0.168889	0.166038	0.16129	0.180812	0.169231	0.144201	0.141509	0.164706	0.180921
Cratylia mollis	0.24209	0.242826	0.240321	0.240768	0.240207	0.240413	0.240441	0.241176	0.24059	0.239882	0.239416	0.235883	0.239437	0.23742	0.237518	0.23373	0.234057	0.238439	0.238963	0.239658
Millettia dura	0.177062	0.177614	0.178	0.178404	0.177495	0.176273	0.175333	0.176	0.175567	0.174465	0.174867	0.174935	0.173218	0.178456	0.176702	0.173299	0.172657	0.175889	0.179587	0.175405	0.268206
Centrosema pubescens	0.179727	0.180706	0.178955	0.177954	0.178003	0.177954	0.176344	0.177061	0.177106	0.177023	0.178674	0.179505	0.177536	0.1777	0.177295	0.175378	0.175499	0.17847	0.181881	0.178771	0.236825	0.178703
Medicago radiata	0.215106	0.21584	0.215875	0.214676	0.214416	0.213852	0.214806	0.215152	0.214459	0.212637	0.21459	0.213942	0.213456	0.214753	0.213557	0.208309	0.207845	0.212103	0.216295	0.211334	0.242155	0.210113	0.211775
Vicia faba	0.248034	0.248558	0.248431	0.249471	0.248156	0.247624	0.249868	0.250132	0.249735	0.247488	0.248549	0.248175	0.248536	0.24948	0.247654	0.245215	0.245342	0.248298	0.248457	0.246234	0.268904	0.238532	0.24294	0.270683
Hedysarum semenovii	0.255484	0.256129	0.257069	0.257792	0.256477	0.25666	0.255979	0.256294	0.255829	0.253394	0.252415	0.250792	0.251771	0.256834	0.254302	0.248759	0.248914	0.255605	0.258286	0.256066	0.262053	0.235083	0.24434	0.243849	0.27955
Lotus japonicus	0.147789	0.148328	0.148765	0.14777	0.146996	0.146315	0.148168	0.147929	0.147391	0.14617	0.146774	0.148384	0.146249	0.148363	0.14673	0.146583	0.146062	0.146794	0.15109	0.14723	0.200168	0.164484	0.16324	0.180188	0.215305	0.208205
Robinia pseudoacacia	0.171759	0.172585	0.172951	0.173768	0.17207	0.171953	0.171642	0.171358	0.171261	0.16778	0.170549	0.172609	0.169167	0.172581	0.170334	0.167187	0.167449	0.169106	0.176378	0.169342	0.235739	0.177898	0.182955	0.213318	0.253918	0.250925	0.150922
Sesbania drummondii	0.158094	0.15885	0.158647	0.157456	0.156463	0.156061	0.154771	0.155639	0.154484	0.153379	0.153846	0.155261	0.151927	0.157856	0.155556	0.151908	0.151406	0.155108	0.159913	0.154466	0.227298	0.172788	0.172564	0.200997	0.236971	0.234582	0.14671	0.158809
Goodia macrocarpa	0.179435	0.180108	0.18	0.178258	0.177343	0.176669	0.178451	0.179245	0.17862	0.177027	0.176431	0.176741	0.177507	0.177388	0.176509	0.176321	0.175796	0.178642	0.180653	0.177503	0.232698	0.186047	0.182962	0.206912	0.235906	0.231397	0.167157	0.179276	0.169732
Mirbelia oxylobioides	0.163399	0.16409	0.164109	0.16318	0.162972	0.163082	0.162403	0.162708	0.162694	0.161387	0.161329	0.161328	0.160981	0.163982	0.162791	0.161143	0.161051	0.162559	0.167913	0.164058	0.211368	0.173175	0.172598	0.18797	0.219153	0.216082	0.156999	0.166667	0.158462	0.168592
Genista tinctoria	0.170287	0.170988	0.172148	0.173295	0.171975	0.170801	0.171127	0.171589	0.172463	0.169252	0.171388	0.172318	0.171408	0.174003	0.171626	0.16891	0.169024	0.17036	0.174646	0.17239	0.223004	0.175612	0.182774	0.19847	0.231824	0.228021	0.159675	0.176302	0.163026	0.178158	0.166591
Templetonia retusa	0.18125	0.182031	0.18323	0.183386	0.182602	0.181034	0.179567	0.18048	0.18125	0.178349	0.180047	0.181818	0.180742	0.17997	0.178571	0.177991	0.177384	0.181054	0.187783	0.180859	0.240689	0.183477	0.190476	0.212613	0.244348	0.24	0.164591	0.184729	0.173988	0.181673	0.177017	0.180338
Ormosia bahiensis	0.191195	0.192211	0.19226	0.194162	0.193384	0.191868	0.190416	0.192453	0.191327	0.188776	0.190898	0.191932	0.190231	0.191159	0.189091	0.183391	0.183603	0.189487	0.194444	0.194946	0.262582	0.188546	0.196779	0.233189	0.269626	0.271532	0.164024	0.192708	0.174727	0.196721	0.179914	0.18702	0.205709
Arachis hypogaea	0.172591	0.173196	0.171971	0.171754	0.171311	0.171148	0.170279	0.170795	0.169684	0.170555	0.169918	0.171501	0.16943	0.170892	0.171006	0.168663	0.168747	0.169043	0.173782	0.170288	0.210635	0.179053	0.173184	0.202942	0.228253	0.223852	0.167093	0.176101	0.176732	0.180556	0.171687	0.166382	0.178032	0.180995
Zornia myriadena	0.171674	0.171569	0.170613	0.169429	0.169118	0.168305	0.167785	0.168395	0.167789	0.168103	0.166971	0.168769	0.166871	0.169249	0.169073	0.16745	0.167549	0.168269	0.170775	0.167857	0.217431	0.173522	0.174922	0.202003	0.2263	0.22369	0.162314	0.1742	0.166503	0.177889	0.170497	0.167726	0.17437	0.180284	0.164507
Amorpha fruticosa	0.16682	0.167587	0.16819	0.166976	0.167442	0.16589	0.164358	0.165282	0.1662	0.163551	0.165282	0.165022	0.164948	0.166071	0.163669	0.160761	0.161039	0.164112	0.170415	0.169203	0.235692	0.176371	0.177592	0.211351	0.242932	0.234452	0.150289	0.174477	0.160502	0.177246	0.166401	0.162591	0.176558	0.182759	0.170551	0.165851
